# Supplementary material for: High throughput screening of cytokines, chemokines and matrix metalloproteinases in wound fluid induced by mammary surgery
Source: PubMed Central journal article supplement (PMC4745727; doi:10.18632/oncotarget.4828), 2015-08-10
Supplement: oncotarget-06-29296-s001.pdf [file oncotarget-06-29296-s001.pdf]

**SUPPLEMENTARY FIGURE AND TABLES**

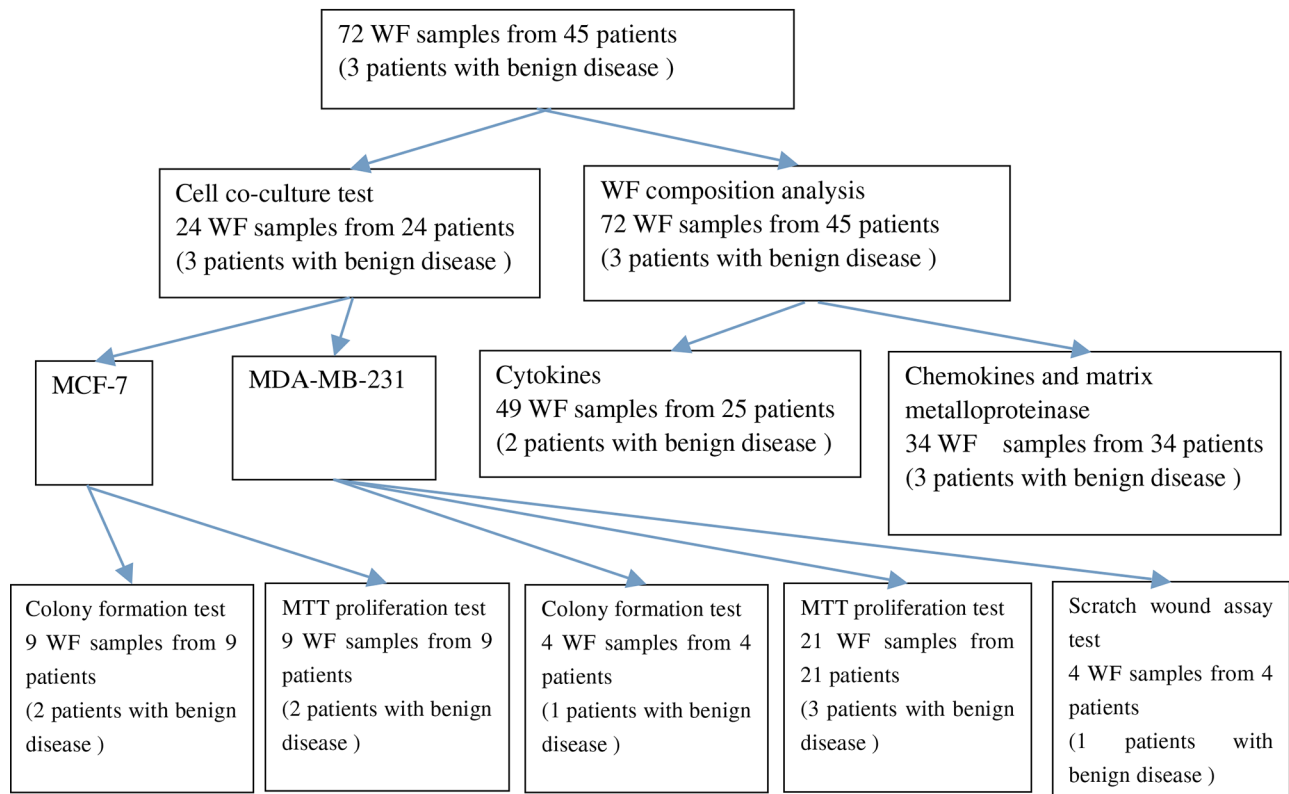

**Supplementary Figure S1: The total WF samples and their source for all tests.**

**Supplementary Table S1: Main characteristics of WF samples for cell co-culture test**

| Characteristics of samples |     | No.   |            |
|----------------------------|-----|-------|------------|
|                            |     | MCF-7 | MDA-MB-231 |
| Co-culture with            |     |       |            |
| WF from-                   |     |       |            |
| Benign disease             |     | 2     | 3          |
| Breast cancer              |     | 7     | 18         |
| neoadjuvant chemotherapy   |     |       |            |
| +                          |     | 3     | 8          |
| Therapy regimen            | CEF | 0     | 2          |
|                            | TE  | 3     | 4          |
|                            | TC  | 0     | 2          |
| -                          |     | 4     | 10         |
| T stage                    |     |       |            |
| T1                         |     | 1     | 7          |
| T2                         |     | 6     | 11         |
| N stage                    |     |       |            |
| N0                         |     | 2     | 9          |
| N1-3                       |     | 5     | 9          |
| Pathological type          |     |       |            |
| Invasion breast cancer     |     | 7     | 17         |
| Carcinoma in situ          |     | 0     | 1          |
| Pathological stage         |     |       |            |
| II                         |     | 7     | 15         |
| III                        |     |       | 2          |
| Molecular subtype          |     |       |            |
| Luminal A                  |     | 2     | 2          |
| Luminal B                  |     | 2     | 8          |
| HER2 overexpression        |     | 1     | 4          |
| Basal-like                 |     | 2     | 2          |

(1) 24 WF samples from 24 patients were enrolled for the cell co-culture study. Among three patients with benign disease, two patients were diagnosed as mammary fibroadenosis and one as intraductal papilloma.

(2) There were two patients in MDA-MB-231 co-culture test not accepted immunohistochemistry test for tumor subtype assay.

(3) CEF = Cyclophosphamide/Epirubicin/5-Fluorouracil

TE = Docetaxel/Epirubicin

TC = Docetaxel/Cyclophosphamide

**Supplementary Table S2: Main characteristics of 49 samples from 25 patients for WF composition of cytokines test**

| Characteristics of patients |     | No. | %     | Characteristics of WF samples                         |     | No. | %     |
|-----------------------------|-----|-----|-------|-------------------------------------------------------|-----|-----|-------|
| WF from-                    |     |     |       | WF from-                                              |     |     |       |
| Benign disease              |     | 2   | 8.00  | Benign disease                                        |     | 2   | 4.08  |
| Breast cancer               |     | 23  | 92.00 | Breast cancer                                         |     | 47  | 95.92 |
| Breast cancer patients      |     |     |       | Breast cancer WF samples                              |     |     |       |
| Age at surgery, years       |     |     |       | The collection time, days after surgery (without NAC) |     |     |       |
| ≤ 45                        |     | 8   | 34.78 | 1                                                     |     | 6   | 15.78 |
| > 45                        |     | 15  | 65.22 | 2                                                     |     | 10  | 26.32 |
| NAC                         |     |     |       | 3                                                     |     | 12  | 31.58 |
| +                           |     | 4   | 17.39 | 4                                                     |     | 10  | 26.32 |
| Therapy regimen             | CEF |     | 2     | Age at surgery, years                                 |     |     |       |
|                             | TE  |     | 2     | ≤ 45                                                  |     | 18  | 38.30 |
| -                           |     | 19  | 82.61 | > 45                                                  |     | 29  | 61.70 |
| T stage                     |     |     |       | NAC (postoperative day 2)                             |     |     |       |
| T1                          |     | 9   | 39.13 | +                                                     |     | 7   | 41.18 |
| T2                          |     | 14  | 60.87 | Therapy regimen                                       | CEF |     | 3     |
| N stage                     |     |     |       |                                                       | TE  |     | 4     |
| N0                          |     | 15  | 65.22 | -                                                     |     | 10  | 58.82 |
| N1-3                        |     | 8   | 34.78 |                                                       |     |     |       |
| Pathological type           |     |     |       | T stage                                               |     |     |       |
| Invasion breast cancer      |     | 19  | 82.61 | T1                                                    |     | 19  | 40.43 |
| Carcinoma in situ           |     | 4   | 17.39 | T2                                                    |     | 28  | 59.57 |
| Pathological stage          |     |     |       | N stage                                               |     |     |       |
| II                          |     | 16  | 84.21 | N0                                                    |     | 33  | 70.21 |
| III                         |     | 3   | 15.79 | N1-3                                                  |     | 14  | 29.79 |
| Molecular subtype           |     |     |       | Drainage tube location                                |     |     |       |
| Luminal A                   |     | 4   | 18.18 | Chest well                                            |     | 20  | 42.55 |
| Luminal B                   |     | 11  | 50.00 | axilla                                                |     | 22  | 46.81 |
| HER2 overexpression         |     | 3   | 13.64 | Mix                                                   |     | 5   | 10.64 |
| Basal-like                  |     | 4   | 18.18 |                                                       |     |     |       |

- (1) The two benign disease patients were diagnosed as mammary fibroadenosis.  
(2) There was one patient not accepted immunohistochemistry test for tumor subtype assay.  
(3) NAC = Neoadjuvant chemotherapy  
CEF = Cyclophosphamide/Epirubicin/5-Fluorouracil  
TE = Docetaxel/Epirubicin

**Supplementary Table S3: Main characteristics of 34 samples from 34 patients for WF composition of chemokines and matrix metalloproteinases tests**

| Characteristics                        |     | No. | %     |
|----------------------------------------|-----|-----|-------|
| WF from-                               |     |     |       |
| Benign disease                         |     | 3   | 8.82  |
| Breast cancer                          |     | 31  | 91.18 |
| WF samples from breast cancer patients |     |     |       |
| Age at surgery, years                  |     |     |       |
| ≤ 45                                   |     | 8   | 25.81 |
| > 45                                   |     | 23  | 74.19 |
| Neoadjuvant chemotherapy               |     |     |       |
| +                                      |     | 8   | 25.81 |
| Therapy regimen                        | CEF | 2   |       |
|                                        | TE  | 4   |       |
|                                        | TC  | 2   |       |
| -                                      |     | 23  | 74.19 |
| T stage                                |     |     |       |
| Tis                                    |     | 3   | 9.68  |
| T1                                     |     | 15  | 48.39 |
| T2                                     |     | 13  | 41.93 |
| N stage                                |     |     |       |
| N0                                     |     | 19  | 61.29 |
| N1-3                                   |     | 12  | 38.71 |
| Pathological type                      |     |     |       |
| Invasion breast cancer                 |     | 24  | 77.42 |
| Carcinoma in situ                      |     | 7   | 22.58 |
| Pathological stage                     |     |     |       |
| I                                      |     | 1   | 4.17  |
| II                                     |     | 22  | 91.66 |
| III                                    |     | 1   | 4.17  |
| Molecular subtype                      |     |     |       |
| Luminal A                              |     | 6   | 22.22 |
| Luminal B                              |     | 15  | 55.56 |
| HER2 overexpression                    |     | 4   | 14.81 |
| Basal-like                             |     | 2   | 7.41  |

(1) Among the three benign disease patients, two patients were diagnosed as mammary fibroadenosis and one as intraductal papilloma.

(2) There were four patients not accepted immunohistochemistry test for tumor subtype assay.

(3) CEF = Cyclophosphamide/Epirubicin/5-Fluorouracil

TE = Docetaxel/Epirubicin

TC = Docetaxel/Cyclophosphamide

**Supplementary Table S4: The differences of various factors' concentration in WF between benign disease and breast cancer groups**

| Biological factor | group          | N  | Median (pg/ml) |
|-------------------|----------------|----|----------------|
| IL-1 $\beta$      | Benign disease | 2  | 336.17         |
|                   | Breast cancer  | 47 | 314.00         |
| IL-4              | Benign disease | 2  | 24.39          |
|                   | Breast cancer  | 47 | 17.52          |
| IL-6              | Benign disease | 2  | 128039.81      |
|                   | Breast cancer  | 47 | 127931.81      |
| IL-10             | Benign disease | 2  | 138.83         |
|                   | Breast cancer  | 47 | 251.33         |
| IL-17A            | Benign disease | 2  | 41.92          |
|                   | Breast cancer  | 47 | 37.84          |
| IL-17F            | Benign disease | 2  | 84.90          |
|                   | Breast cancer  | 44 | 74.26          |
| IL-21             | Benign disease | 2  | 818.50         |
|                   | Breast cancer  | 45 | 663.69         |
| IL-22             | Benign disease | 2  | 8.51           |
|                   | Breast cancer  | 35 | 12.39          |
| IL-23             | Benign disease | 2  | 37.42          |
|                   | Breast cancer  | 36 | 57.37          |
| IL-25             | Benign disease | 2  | 12.97          |
|                   | Breast cancer  | 45 | 11.22          |
| IL-31             | Benign disease | 2  | 55.49          |
|                   | Breast cancer  | 47 | 42.04          |
| IL-33             | Benign disease | 2  | 270.56         |
|                   | Breast cancer  | 47 | 42.75          |
| IFN $\gamma$      | Benign disease | 2  | 184.43         |
|                   | Breast cancer  | 38 | 156.29         |
| CD40L             | Benign disease | 2  | 387.73         |
|                   | Breast cancer  | 47 | 234.39         |
| TNF $\alpha$      | Benign disease | 2  | 30.31          |
|                   | Breast cancer  | 47 | 109.24         |
| CCL1              | Benign disease | 3  | 103.13         |
|                   | Breast cancer  | 31 | 112.2          |
| CCL2              | Benign disease | 3  | 8626.73        |
|                   | Breast cancer  | 31 | 7490.56        |
| CCL3              | Benign disease | 3  | 239.52         |

(Continued)

| Biological factor | group          | N  | Median (pg/ml) |
|-------------------|----------------|----|----------------|
|                   | Breast cancer  | 31 | 216.17         |
| CCL7              | Benign disease | 3  | 1377.59        |
|                   | Breast cancer  | 31 | 890.49         |
| CCL8              | Benign disease | 3  | 71.39          |
|                   | Breast cancer  | 31 | 101.18         |
| CCL11             | Benign disease | 3  | 27.56          |
|                   | Breast cancer  | 31 | 28.89          |
| CCL13             | Benign disease | 3  | 50.29          |
|                   | Breast cancer  | 31 | 65.42          |
| CCL15             | Benign disease | 3  | 1691.70        |
|                   | Breast cancer  | 30 | 929.25         |
| CCL17             | Benign disease | 3  | 182.09         |
|                   | Breast cancer  | 31 | 184.79         |
| CCL19             | Benign disease | 3  | 499.75         |
|                   | Breast cancer  | 31 | 386.17         |
| CCL20             | Benign disease | 3  | 1867.66        |
|                   | Breast cancer  | 31 | 3611.83        |
| CCL21             | Benign disease | 2  | 436908.53      |
|                   | Breast cancer  | 29 | 96973.60       |
| CCL22             | Benign disease | 3  | 3005.85        |
|                   | Breast cancer  | 31 | 1238.80        |
| CCL23             | Benign disease | 3  | 289.94         |
|                   | Breast cancer  | 31 | 265.41         |
| CCL24             | Benign disease | 3  | 315.07         |
|                   | Breast cancer  | 31 | 378.55         |
| CCL25             | Benign disease | 3  | 2025.61        |
|                   | Breast cancer  | 31 | 2391.63        |
| CCL26             | Benign disease | 3  | 102.23         |
|                   | Breast cancer  | 31 | 124.43         |
| CCL27             | Benign disease | 3  | 581.84         |
|                   | Breast cancer  | 31 | 1354.17        |
| CXCL1             | Benign disease | 3  | 1342.78        |
|                   | Breast cancer  | 31 | 1330.81        |
| CXCL2             | Benign disease | 3  | 395.16         |
|                   | Breast cancer  | 31 | 478.36         |
| CXCL5             | Benign disease | 3  | 5360.75        |
|                   | Breast cancer  | 31 | 7038.40        |

(Continued)

| Biological factor | group          | N  | Median (pg/ml) |
|-------------------|----------------|----|----------------|
| CXCL6             | Benign disease | 3  | 83.89          |
|                   | Breast cancer  | 31 | 96.24          |
| CXCL9             | Benign disease | 3  | 585.15         |
|                   | Breast cancer  | 29 | 901.81         |
| CXCL10            | Benign disease | 3  | 417.04         |
|                   | Breast cancer  | 31 | 472.05         |
| CXCL11            | Benign disease | 3  | 11.66          |
|                   | Breast cancer  | 31 | 25.68          |
| CXCL12            | Benign disease | 3  | 2161.32        |
|                   | Breast cancer  | 31 | 2004.96        |
| CXCL13            | Benign disease | 3  | 19.75          |
|                   | Breast cancer  | 31 | 18.27          |
| CXCL16            | Benign disease | 3  | 1066.81        |
|                   | Breast cancer  | 31 | 994.43         |
| CX3CL1            | Benign disease | 3  | 1431.39        |
|                   | Breast cancer  | 31 | 1862.78        |
| MMP-1             | Benign disease | 3  | 52166.35       |
|                   | Breast cancer  | 31 | 34161.72       |
| MMP-2             | Benign disease | 3  | 474000.92      |
|                   | Breast cancer  | 31 | 221828.01      |
| MMP-3             | Benign disease | 3  | 150125.86      |
|                   | Breast cancer  | 31 | 190171.94      |
| MMP-7             | Benign disease | 3  | 71996.59       |
|                   | Breast cancer  | 31 | 24602.15       |
| MMP-8             | Benign disease | 3  | 399455.46      |
|                   | Breast cancer  | 31 | 446213.40      |
| MMP-9             | Benign disease | 3  | 275231.39      |
|                   | Breast cancer  | 31 | 305829.68      |
| MMP-10            | Benign disease | 3  | 15114.81       |
|                   | Breast cancer  | 31 | 16106.90       |
| MMP-12            | Benign disease | 3  | 900.67         |
|                   | Breast cancer  | 31 | 690.04         |
| MMP-13            | Benign disease | 3  | 1104.80        |
|                   | Breast cancer  | 31 | 947.03         |
